# Supplementary material
Source: publisher site journal article supplement (https://www.spandidos-publications.com/4564/downloadSupplementary)

Figure S1. Progression-free survival curve analyses in the training cohort.

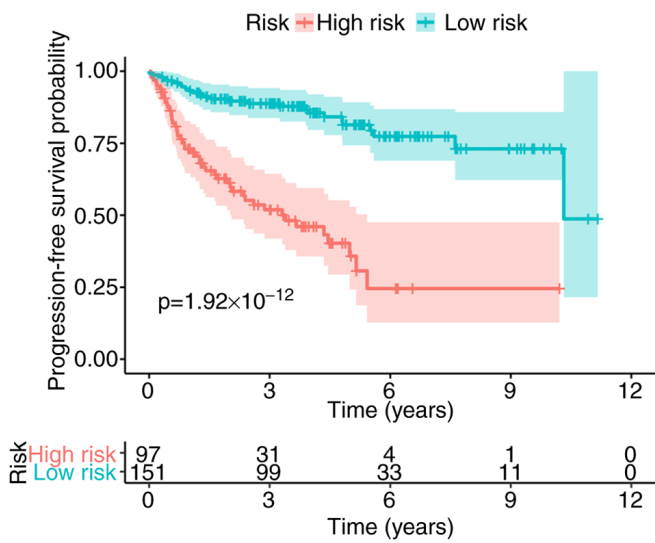

Figure S2. Progression-free survival curve analyses in the validation cohort.

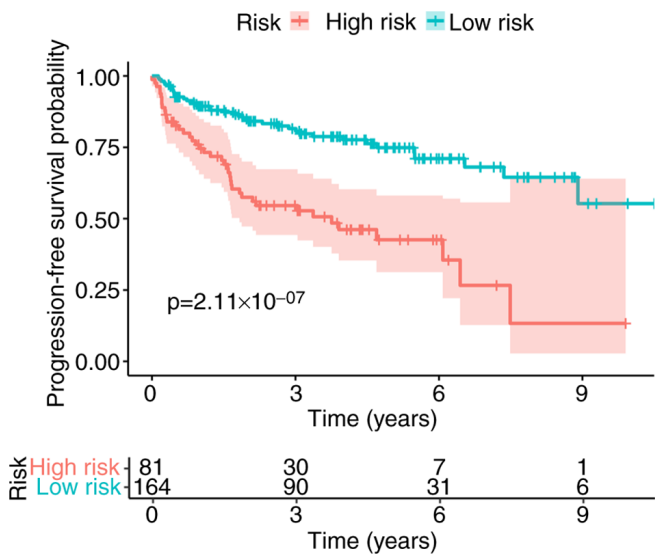

Supplement: Supplementary file 1 [file downloadSupplementary]
